# Supplementary material for: Enhanced activated carbon lithium-ion capacitor electrochemical stability through electrolyte dielectric optimisation
Source: Royal Society of Chemistry journal article supplement (doi:10.1039/d3se00122a), 2023-01-01
Supplement: d3se00122a1.pdf [file d3se00122a1.pdf]

## Supporting Information

### Enhanced activated carbon lithium-ion capacitor electrochemical stability through electrolyte dielectric optimization

Obinna Egwu Eleri<sup>a,b</sup>, Julie Pires<sup>a</sup>, Frederik Huld<sup>a</sup>, Song Lu<sup>b</sup>, Philipp Schweigart<sup>c</sup>, Ann Mari Svensson<sup>c</sup>, Fengliu Lou<sup>a\*</sup>, and Zhixin Yu<sup>b\*</sup>

<sup>a</sup> Beyonder AS, Stokkamyrveien 30, 4313 Sandnes, Norway

<sup>b</sup> Department of Energy and Petroleum Engineering, University of Stavanger, 4036 Stavanger, Norway

<sup>c</sup> Department of Material Science and Engineering, Norwegian University of Science and Technology, 7034 Trondheim, Norway

#### Corresponding authors\*

ZY: zhixin.yu@uis.no

FL: fengliu@beyonder.no

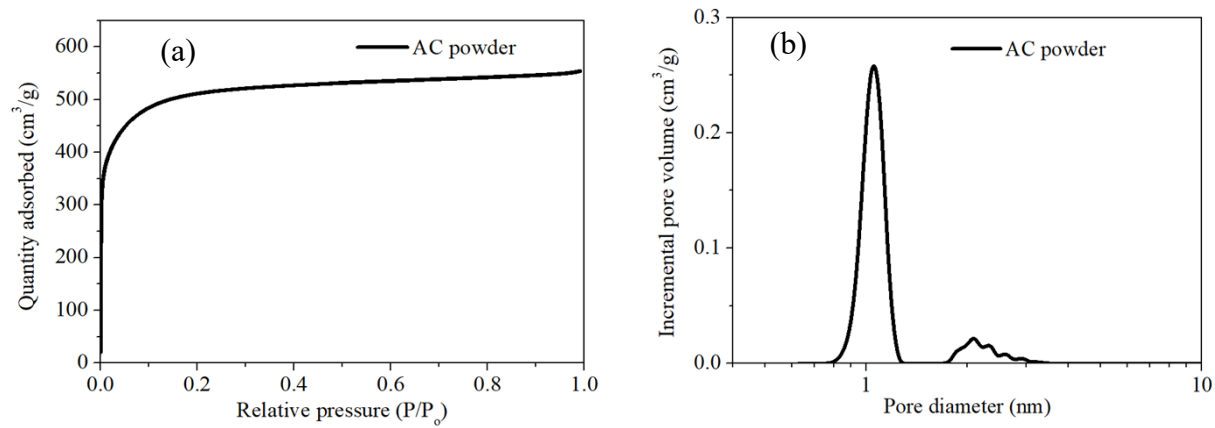

Figure S1: (a) Nitrogen adsorption/desorption isotherm, and (b) Pore size distribution of the AC.

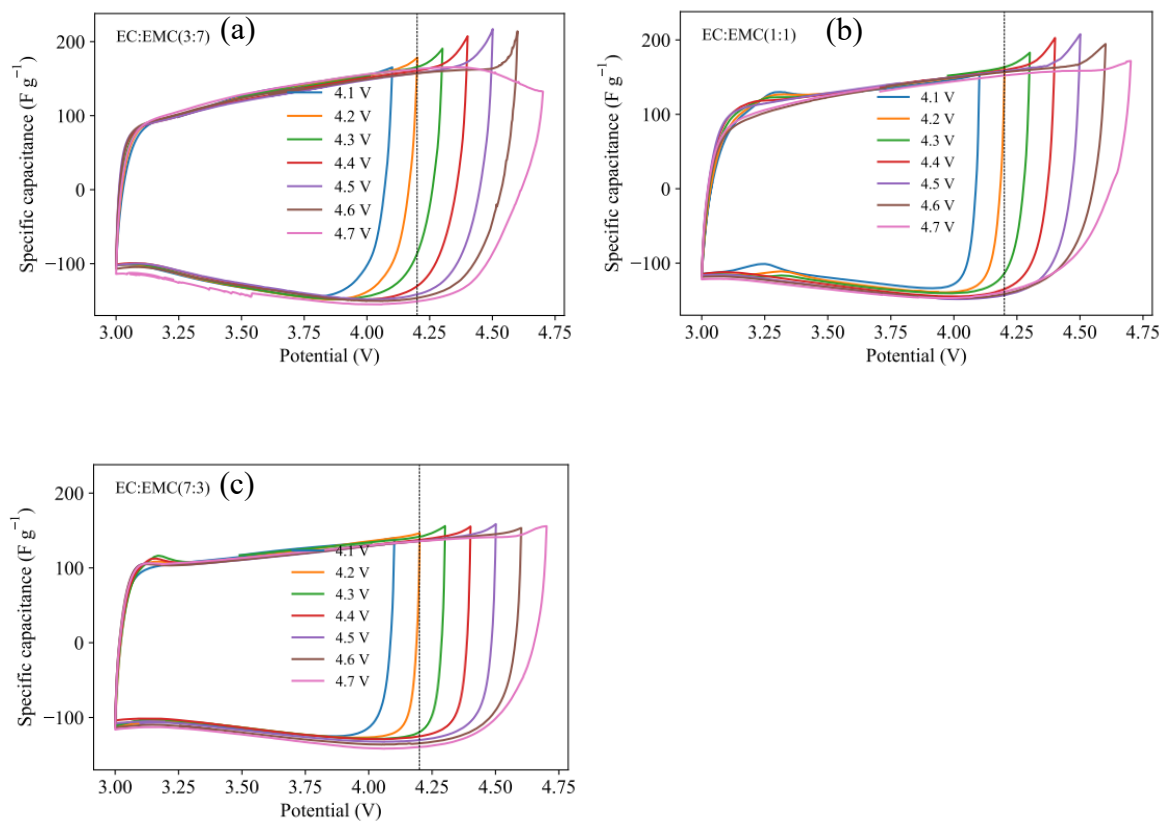

Figure S2: Cyclic voltammograms of the EC:EMC solvent combinations at various potential windows (a) EC:EMC (3:7), (b) EC:EMC (1:1), and (c) EC:EMC (7:3)

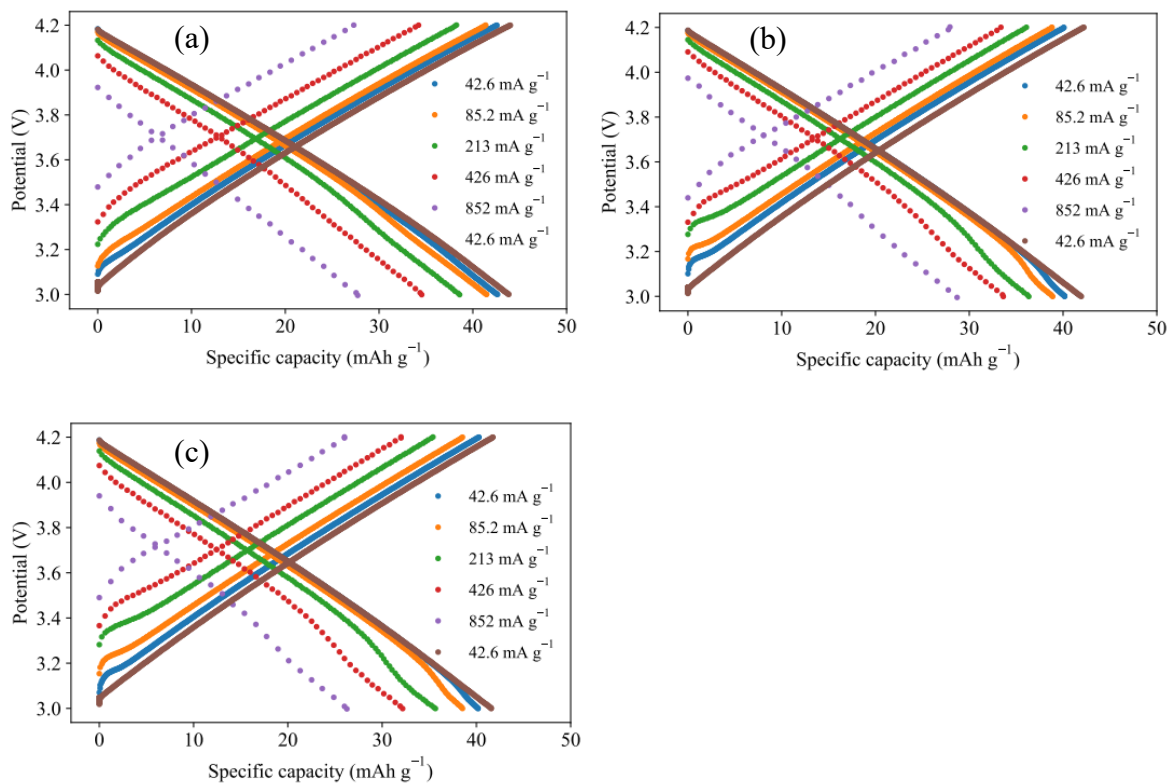

Figure S3: Charge and discharge plots at different C-rates. (a) EC:EMC (3:7), (b) EC:EMC (1:1), and (c) EC:EMC (7:3).

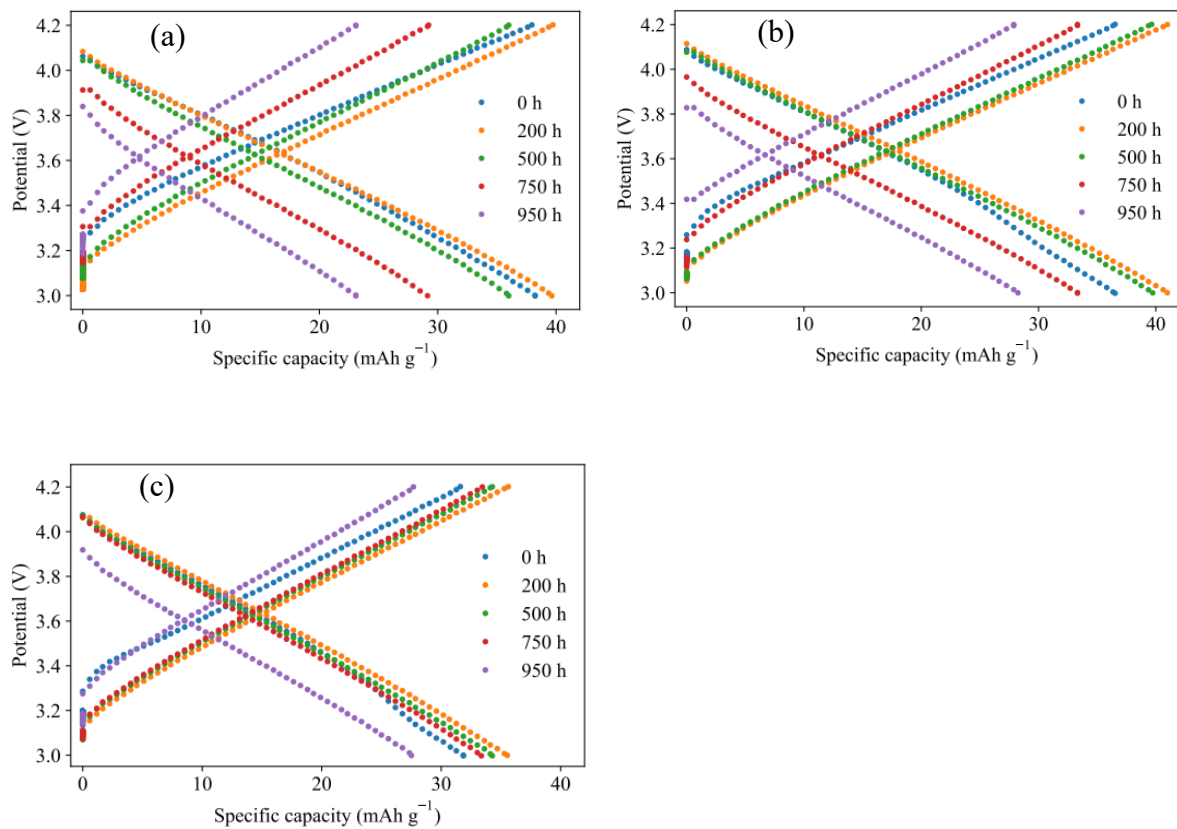

Figure S4: Charge and discharge plots after different durations of floating voltage (a) EC:EMC (3:7), (b) EC:EMC (1:1), and (c) EC:EMC (7:3).
